# Supplementary material
Source: HighWire-hosted journal article supplement (https://lupus.bmj.com/content/10/2/e001005)
Supplement: inline-supplementary-material-1 [file inline-supplementary-material-1.pdf]

**Supplementary table 1.** Attrition analysis on the SLE patients performing the brain MRI analysis vs. SLE patients excluded from the brain MRI analysis showed no major differences between groups.

|                                       | Whole SLE cohort<br>(N=33) | Brain MRI SLE cohort<br>(N=20) | p     |
|---------------------------------------|----------------------------|--------------------------------|-------|
| Age, years mean (DS)                  | 43.5 (14.0)                | 41.9 (12.2)                    | 0.577 |
| Gender, male                          | 3 (9%)                     | 3 (15%)                        | 0.406 |
| Disease duration, months median (IQR) | 124.4 (34.7-305)           | 176.3 (77.4-417.3)             | 0.886 |
| SLEDAI-2k, median (IQR)               | 4 (0-14)                   | 6 (2-10.8)                     | 0.107 |
| SLICC-DI, median (IQR)                | 0 (0-1)                    | 0 (0-1)                        | 0.078 |
| Anti-P                                | 6 (18.2%)                  | 4 (21.1%)                      | 0.504 |
| Anti-NR2                              | 14 (42.4%)                 | 8 (42.1%)                      | 0.782 |
| C3, mg/dl mean (DS)                   | 89.9 (20.8)                | 86.6 (24.1)                    | 0.714 |
| C4, mg/dl mean (DS)                   | 13.7 (6.6)                 | 13.4 (5.2)                     | 0.974 |
| Antiphospholipid <sup>#</sup>         | 11 (33.3%)                 | 10 (52.6%)                     | 0.126 |
| anti-dsDNA                            | 18 (54.5%)                 | 10 (50%)                       | 0.502 |
| Anti-Ro/SSA                           | 16 (48.5%)                 | 6 (31.6%)                      | 0.021 |
| Anti-La/SSB                           | 4 (12.1%)                  | 2 (10.5%)                      | 0.813 |
| Anti-RNP                              | 11 (33.3%)                 | 4 (21.1%)                      | 0.024 |
| anti-Sm                               | 10 (30.3%)                 | 5 (26.3%)                      | 0.635 |
| SF-12 questionnaire, median (IQR)     | 35.0 (31.0-37.0)           | 32 (21.0-36.0)                 | 0.835 |
| SF-12 MCS, median (IQR)               | 19.0 (21.0-16.5)           | 18 (13.8-20.0)                 | 0.014 |
| SF-12 PCS, median (IQR)               | 14.5 (13.0-17.0)           | 14.5 (11.8-17.3)               | 0.059 |
| Dose PDN mg/daily, median (IQR)       | 6.4 (3.8-13.5)             | 8.1 (3.9-14.5)                 | 0.566 |

Unless otherwise specified, values are absolute numbers, and values in brackets are percentages.

# Lupus anticoagulant and/or anticardiolipin IgM/IgG and/or anti-B2glycoprotein1 IgM/IgG. MCS : mental component summary PCS : physical component summary.

**Supplementary table 2.** Table reporting the results of the resting-state functional connectivity (rs-fc) MRI analysis of the effects of Anti-P serum levels on cerebral networks, according to brain theory, using the CONN's default atlas for mapping the regions. The significant results ( $p$ -FDR < 0.05) of the correlation between two region of interest to region of interest are reported for each property of the brain (as represented in figure 2).

| Average path length                         |      |   |     |       |       |  |
|---------------------------------------------|------|---|-----|-------|-------|--|
| ROI (according to the Conn's default atlas) | beta | T | dof | p-unc | p-FDR |  |

| Network                                                                                        | <0.01 | 2.99 | 8 | 0.017219 | -        |
|------------------------------------------------------------------------------------------------|-------|------|---|----------|----------|
| atlas.pTFusC l (Temporal Fusiform Cortex, posterior division Left) x,y,z = (-36,-30,-25) mm    | 0.01  | 9.13 | 8 | 0.000017 | 0.00111  |
| <b>atlas.pPaHC l (Parahippocampal Gyrus, posterior division Left) x,y,z = (-22,-32,-17) mm</b> | <0.01 | 9.12 | 8 | 0.000017 | 0.00111  |
| atlas.Accumbens r (Accumbens Right) x,y,z = (9,12,-7) mm                                       | 0.01  | 8.58 | 8 | 0.000026 | 0.001158 |
| atlas.toITG l (Inferior Temporal Gyrus, temporooccipital part Left) x,y,z = (-52,-53,-17) mm   | <0.01 | 7.64 | 8 | 0.000061 | 0.002013 |
| atlas.SubCalC (Subcallosal Cortex) x,y,z = (-0,21,-15) mm                                      | <0.01 | 7.32 | 8 | 0.000083 | 0.002179 |
| atlas.Ver6 (Vermis 6) x,y,z = (1,-66,-16) mm                                                   | <0.01 | 6.44 | 8 | 0.0002   | 0.004308 |
| atlas.MedFC (Frontal Medial Cortex) x,y,z = (0,43,-19) mm                                      | <0.01 | 6.21 | 8 | 0.000257 | 0.004308 |
| atlas.Cereb1 l (Cerebelum Crus1 Left) x,y,z = (-36,-66,-30) mm                                 | <0.01 | 6.19 | 8 | 0.000261 | 0.004308 |
| atlas.Ver3 (Vermis 3) x,y,z = (1,-40,-11) mm                                                   | <0.01 | 5.91 | 8 | 0.000356 | 0.005225 |
| atlas.Ver12 (Vermis 1 2) x,y,z = (1,-39,-20) mm                                                | 0.01  | 5.09 | 8 | 0.000936 | 0.012361 |
| atlas.Cereb2 l (Cerebelum Crus2 Left) x,y,z = (-29,-73,-38) mm                                 | <0.01 | 4.64 | 8 | 0.001675 | 0.018863 |
| atlas.Cereb6 r (Cerebelum 6 Right) x,y,z = (24,-58,-25) mm                                     | <0.01 | 4.62 | 8 | 0.001715 | 0.018863 |
| atlas.Ver45 (Vermis 4 5) x,y,z = (1,-52,-7) mm                                                 | <0.01 | 4.19 | 8 | 0.003027 | 0.030732 |
| atlas.Cereb10 l (Cerebelum 10 Left) x,y,z = (-23,-34,-42) mm                                   | 0.01  | 4.29 | 7 | 0.003602 | 0.033959 |
| atlas.Cereb1 r (Cerebelum Crus1 Right) x,y,z = (38,-67,-30) mm                                 | <0.01 | 3.93 | 8 | 0.004362 | 0.036503 |
| atlas.Ver9 (Vermis 9) x,y,z = (1,-55,-35) mm                                                   | <0.01 | 3.92 | 8 | 0.004431 | 0.036503 |
| atlas.sLOC l (Lateral Occipital Cortex, superior division Left) x,y,z = (-32,-73,38) mm        | <0.01 | 3.86 | 8 | 0.004779 | 0.036503 |
| atlas.Ver8 (Vermis 8) x,y,z = (1,-64,-34) mm                                                   | <0.01 | 3.84 | 8 | 0.004978 | 0.036503 |
| atlas.sLOC r (Lateral Occipital Cortex, superior division Right) x,y,z = (33,-71,39) mm        | <0.01 | 3.79 | 8 | 0.005344 | 0.037124 |
| atlas.Hippocampus l x,y,z = (-25,-23,-14) mm                                                   | <0.01 | 3.62 | 8 | 0.006794 | 0.044841 |
| atlas.OFusG l (Occipital Fusiform Gyrus Left) x,y,z = (-27,-77,-14) mm                         | <0.01 | 3.58 | 8 | 0.007158 | 0.044993 |
| atlas.Cereb10 r (Cerebelum 10 Right) x,y,z = (26,-34,-41) mm                                   | <0.01 | 3.71 | 7 | 0.007572 | 0.045433 |

| Global efficiency                                                                            |       |      |     |          |          |
|----------------------------------------------------------------------------------------------|-------|------|-----|----------|----------|
| ROI (according to the Conn's default atlas)                                                  | beta  | T    | dof | p-unc    | p-FDR    |
| Network                                                                                      | <0.01 | -2.2 | 8   | 0.05756  | -        |
| atlas.pPaHC l (Parahippocampal Gyrus, posterior division Left) x,y,z = (-22,-32,-17) mm      | <0.01 | -6   | 8   | 0.000338 | 0.034656 |
| atlas.Ver45 (Vermis 4 5) x,y,z = (1,-52,-7) mm                                               | <0.01 | -5.5 | 8   | 0.000602 | 0.034656 |
| atlas.Ver6 (Vermis 6) x,y,z = (1,-66,-16) mm                                                 | <0.01 | -5   | 8   | 0.001013 | 0.034656 |
| atlas.Accumbens r (Accumbens Right) x,y,z = (9,12,-7) mm                                     | <0.01 | -4.8 | 8   | 0.001361 | 0.034656 |
| atlas.SubCalC (Subcallosal Cortex) x,y,z = (-0,21,-15) mm                                    | <0.01 | -4.7 | 8   | 0.001559 | 0.034656 |
| atlas.toITG l (Inferior Temporal Gyrus, temporooccipital part Left) x,y,z = (-52,-53,-17) mm | <0.01 | -4.7 | 8   | 0.001575 | 0.034656 |
| atlas.pTFusC l (Temporal Fusiform Cortex, posterior division Left) x,y,z = (-36,-30,-25) mm  | <0.01 | -4.4 | 8   | 0.002266 | 0.042735 |
| atlas.Cereb1 l (Cerebelum Crus1 Left) x,y,z = (-36,-66,-30) mm                               | <0.01 | -4.2 | 8   | 0.003186 | 0.047967 |
| <b>atlas.MedFC (Frontal Medial Cortex) x,y,z = (0,43,-19) mm</b>                             | <0.01 | -4.1 | 8   | 0.00327  | 0.047967 |

| Local efficiency                                          |       |      |     |          |          |
|-----------------------------------------------------------|-------|------|-----|----------|----------|
| ROI (according to the Conn's default atlas)               | beta  | T    | dof | p-unc    | p-FDR    |
| Network                                                   | <0.01 | 1.05 | 8   | 0.326157 | -        |
| atlas.Ver3 (Vermis 3) x,y,z = (1,-40,-11) mm              | <0.01 | -6.7 | 8   | 0.000153 | 0.018014 |
| atlas.MedFC (Frontal Medial Cortex) x,y,z = (0,43,-19) mm | <0.01 | -6.2 | 8   | 0.000273 | 0.018014 |

| Betweenness centrality                                                                 |       |      |     |          |          |
|----------------------------------------------------------------------------------------|-------|------|-----|----------|----------|
| ROI (according to the Conn's default atlas)                                            | beta  | T    | dof | p-unc    | p-FDR    |
| Network                                                                                | <0.01 | 3.06 | 8   | 0.015592 | -        |
| atlas.LG r (Lingual Gyrus Right) x,y,z = (14,-63,-5) mm                                | <0.01 | 10.2 | 8   | 0.000007 | 0.000957 |
| atlas.Ver10 (Vermis 10) x,y,z = (0,-46,-32) mm                                         | <0.01 | 6.06 | 8   | 0.000304 | 0.015764 |
| atlas.Putamen r (Putamen right) x,y,z = (25,2,0) mm                                    | <0.01 | 5.91 | 8   | 0.000358 | 0.015764 |
| atlas.OFusG r (Occipital Fusiform Gyrus Right) x,y,z = (27,-75,-12) mm                 | <0.01 | 5.18 | 8   | 0.000838 | 0.02766  |
| atlas.Pallidum l (Pallidum Left) x,y,z = (-19,-5,-1) mm                                | <0.01 | 4.79 | 8   | 0.001381 | 0.03212  |
| atlas.IFG tri r (Inferior Frontal Gyrus, pars triangularis Right) x,y,z = (52,28,8) mm | <0.01 | 4.74 | 8   | 0.00146  | 0.03212  |
| atlas.aSMG l (Supramarginal Gyrus, anterior division Left) x,y,z = (-57,-33,37) mm     | <0.01 | 4.36 | 8   | 0.002403 | 0.045322 |

| Degree                                                                                  |       |      |     |          |          |
|-----------------------------------------------------------------------------------------|-------|------|-----|----------|----------|
| ROI (according to the Conn's default atlas)                                             | beta  | T    | dof | p-unc    | p-FDR    |
| Network                                                                                 | <0.01 | -0.3 | 8   | 0.774631 | -        |
| atlas.IFG tri l (Inferior Frontal Gyrus, pars triangularis Left) x,y,z = (-50,28,9) mm  | 0.14  | 5.86 | 8   | 0.000377 | 0.044299 |
| atlas.IC l (Insular Cortex Left) x,y,z = (-36,1,0) mm                                   | <0.01 | 4.87 | 8   | 0.001243 | 0.044299 |
| atlas.Ver45 (Vermis 4 5) x,y,z = (1,-52,-7) mm                                          | -0.11 | -4.7 | 8   | 0.001548 | 0.044299 |
| atlas.FO l (Frontal Operculum Cortex Left) x,y,z = (-40,18,5) mm                        | 0.14  | 4.68 | 8   | 0.001576 | 0.044299 |
| atlas.IFG oper l (Inferior Frontal Gyrus, pars opercularis Left) x,y,z = (-51,15,15) mm | 0.16  | 4.63 | 8   | 0.001678 | 0.044299 |

| Cost                                                                                    |       |      |     |          |          |
|-----------------------------------------------------------------------------------------|-------|------|-----|----------|----------|
| ROI (according to the Conn's default atlas)                                             | beta  | T    | dof | p-unc    | p-FDR    |
| Network                                                                                 | <0.01 | 0    | 8   | NaN      | -        |
| atlas.IFG tri l (Inferior Frontal Gyrus, pars triangularis Left) x,y,z = (-50,28,9) mm  | <0.01 | 5.86 | 8   | 0.000377 | 0.044299 |
| atlas.IC l (Insular Cortex Left) x,y,z = (-36,1,0) mm                                   | <0.01 | 4.87 | 8   | 0.001243 | 0.044299 |
| atlas.Ver45 (Vermis 4 5) x,y,z = (1,-52,-7) mm                                          | <0.01 | -4.7 | 8   | 0.001548 | 0.044299 |
| atlas.FO l (Frontal Operculum Cortex Left) x,y,z = (-40,18,5) mm                        | <0.01 | 4.68 | 8   | 0.001576 | 0.044299 |
| atlas.IFG oper l (Inferior Frontal Gyrus, pars opercularis Left) x,y,z = (-51,15,15) mm | <0.01 | 4.63 | 8   | 0.001678 | 0.044299 |

| Clustering coefficient                      |       |      |     |          |       |
|---------------------------------------------|-------|------|-----|----------|-------|
| ROI (according to the Conn's default atlas) | beta  | T    | dof | p-unc    | p-FDR |
| Network                                     | <0.01 | 1.19 | 8   | 0.267329 | -     |
